# Supplementary material for: Genome-Wide Identification of the CER Gene Family and Significant Features in Climate Adaptation of Castanea mollissima
Source: MDPI journal article supplement (doi:10.3390/ijms232416202), 2022-12-19
Supplement: s1 [file s1]

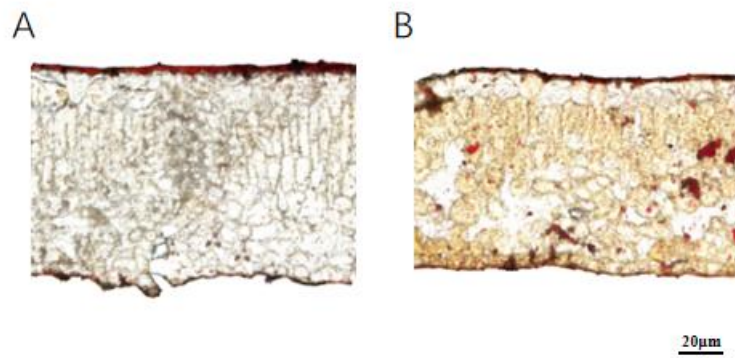

**Figure S1** Complete semi-thin section of Gansu and Tianmu Mountain samples. (A) Gansu sample. (B) Tianmu mountain samples.

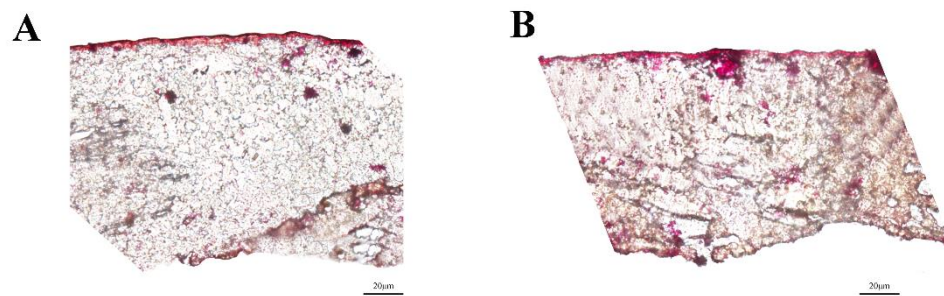

**Figure S2** Complete semi-thin section of Y-2\_grafted and Y-2\_wild samples. (C) Y-2\_Y-2\_grafted sample. (D) Y-2\_wild sample.

**Table S1** Prediction of CmCER family gene cis-elements.

| GENE ID          | Environmental stress |       |                 | Plant hormones |     |     |      |    | MYB binding site     |                        |                     |
|------------------|----------------------|-------|-----------------|----------------|-----|-----|------|----|----------------------|------------------------|---------------------|
|                  | Defense and stress   | Light | Low temperature | ABA            | Aux | GAs | MeJA | SA | Drought inducibility | Flavonoid biosyntheses | MYBHv1 binding site |
| <i>CmCER</i> 1-1 |                      | 17    |                 | 6              |     | 2   |      |    |                      |                        |                     |
| <i>CmCER</i> 1-2 |                      | 11    |                 | 1              | 1   | 1   | 2    |    | 2                    |                        |                     |
| <i>CmCER</i> 1-3 |                      | 7     |                 | 3              |     | 1   | 2    |    |                      |                        |                     |
| <i>CmCER</i> 1-4 | 1                    | 14    | 1               | 3              |     |     |      |    | 1                    |                        |                     |
| <i>CmCER</i> 1-5 |                      | 13    |                 |                |     |     | 4    | 1  | 1                    |                        |                     |
| <i>CmCER</i> 1-6 |                      | 10    | 1               | 1              |     |     | 2    |    |                      |                        |                     |
| <i>CmCER</i> 1-7 |                      | 16    |                 | 3              |     |     | 2    |    |                      |                        |                     |
| <i>CmCER</i> 1-8 | 1                    | 13    |                 | 1              | 1   |     | 2    |    |                      |                        |                     |
| <i>CmCER</i> 1-9 |                      | 6     |                 |                |     | 1   | 4    | 1  |                      |                        |                     |
| <i>CmCER</i> 2   | 2                    | 15    |                 |                | 1   | 1   | 2    |    | 2                    |                        |                     |
| <i>CmCER</i> 3   |                      | 12    |                 | 1              |     |     |      |    | 1                    | 1                      |                     |
| <i>CmCER</i> 4   |                      | 13    |                 | 3              | 1   |     | 2    |    | 1                    |                        |                     |
| <i>CmCER</i> 5-1 |                      | 18    | 1               | 4              |     |     |      |    | 1                    |                        |                     |
| <i>CmCER</i> 5-2 |                      | 7     |                 |                |     | 1   |      |    |                      |                        |                     |
| <i>CmCER</i> 6-1 |                      | 10    |                 | 4              |     | 2   | 2    |    | 1                    |                        | 1                   |
| <i>CmCER</i> 6-2 |                      | 8     | 2               | 2              | 1   |     | 2    | 1  | 1                    |                        | 2                   |
| <i>CmCER</i> 7   |                      | 7     |                 |                | 4   | 1   |      |    | 1                    |                        | 1                   |
| <i>CmCER</i> 8   | 1                    | 10    |                 | 3              |     | 1   | 4    | 1  | 1                    |                        | 1                   |
| <i>CmCER</i> 9-1 |                      | 16    | 2               | 5              |     | 1   | 8    | 2  |                      |                        |                     |

|                      |   |    |   |   |   |   |   |   |   |
|----------------------|---|----|---|---|---|---|---|---|---|
| <i>CmCER</i><br>9-2  | 1 | 10 |   | 2 |   |   |   | 2 |   |
| <i>CmCER</i><br>10-1 | 1 | 6  | 1 |   |   | 2 | 6 |   |   |
| <i>CmCER</i><br>10-2 |   | 13 |   |   |   |   | 2 |   | 1 |
| <i>CmCER</i><br>11-1 |   | 11 |   | 2 |   | 1 | 4 |   |   |
| <i>CmCER</i><br>11-2 |   | 7  | 1 | 1 |   | 5 | 4 | 1 |   |
| <i>CmCER</i><br>13   | 1 | 9  | 1 | 2 | 1 |   |   | 2 |   |
| <i>CmCER</i><br>17   | 1 | 15 |   | 3 |   |   | 4 |   |   |
| <i>CmCER</i><br>60-1 |   | 13 |   |   |   |   | 2 |   | 1 |
| <i>CmCER</i><br>60-2 | 1 | 11 |   | 1 |   | 2 |   | 1 | 1 |
| <i>CmCER</i><br>60-3 | 1 | 10 | 2 | 5 |   |   | 4 | 1 | 1 |
| <i>CmCER</i><br>60-4 | 1 | 8  | 1 | 4 |   |   | 4 | 1 | 1 |
| <i>CmCER</i><br>60-5 |   | 11 |   | 1 | 1 | 1 | 2 |   | 1 |
| <i>CmCER</i><br>60-6 |   | 17 |   | 2 | 2 | 3 |   | 2 |   |
| <i>CmCER</i><br>60-7 | 2 | 12 | 1 | 1 |   | 2 | 2 | 1 | 1 |
| <i>CmCER</i><br>60-8 |   | 21 | 3 | 2 |   |   | 6 | 2 | 2 |

**Table S2** qPT-PCR primers of CmCER family

| <b>GENE ID</b>   | <b>Forward Primer 5'-3' sequence</b> | <b>Reverse Primer 5'-3' sequence</b> |
|------------------|--------------------------------------|--------------------------------------|
| <i>CmCER1-1</i>  | ACTGTTACTACCATAGCCCTCC               | CACTACTCACGAACCGCA                   |
| <i>CmCER1-2</i>  | ACTGTTACTACCATAGCCCTCC               | ACCGCACTCGTGTTTCATT                  |
| <i>CmCER1-3</i>  | TGTTACTACCATAGCCCTCC                 | TTGCTTGCCAAACTTTCT                   |
| <i>CmCER1-4</i>  | CATCTTGACGGGAACTGC                   | ACTTGAGCGGAGGAAACA                   |
| <i>CmCER1-5</i>  | GGAGGAACTTAACGGATAT                  | CAGGCAACCTTAGTGATT                   |
| <i>CmCER1-6</i>  | ACAAGGGCATAATGACTC                   | GTTACTTCCATCCACCAC                   |
| <i>CmCER1-7</i>  | TGATTGAGCAAGCCATA                    | GCTACTTCCATCTACCACC                  |
| <i>CmCER1-8</i>  | CCGCACCAATTACTCACT                   | GCAAATCCTAGCCGTAGA                   |
| <i>CmCER1-9</i>  | GCACCGCCATTATCTTTA                   | TATGTGAGGTAGCCAGCA                   |
| <i>CmCER2</i>    | TCCCAATCTTTGAATCTC                   | ACCCGTCTCCTTTGTTAT                   |
| <i>CmCER3</i>    | TGAGGAATCCCTAAACGC                   | CCCAGTCCCATTCTTTGT                   |
| <i>CmCER4</i>    | GTCTAAAGGTGCTCATCC                   | ATGTCTAATCCAAGGGTC                   |
| <i>CmCER5-1</i>  | ACAAGAAGGCCCAGTCAA                   | TAGCCAGTGCCAACATCA                   |
| <i>CmCER5-2</i>  | TCAGCCAAGTAGTGAGGT                   | TATACAACGGAGGAAGTG                   |
| <i>CmCER6-1</i>  | GATGGGTCCTGATGAAAT                   | GAAGTAAACAGTGGAATAA                  |
| <i>CmCER6-2</i>  | ACATAACGACCAGACCCA                   | GAAACTCCAACGACGATT                   |
| <i>CmCER7</i>    | AAGAACAGGGCTCAAGGG                   | GTTTCTGCCGCCTCAATA                   |
| <i>CmCER8</i>    | GATGCTTGATGGCGTAA                    | CCACTGAGGGCAGTTTGA                   |
| <i>CmCER9-1</i>  | ATTGGTTCATTGGGTTGT                   | TCACGGAAAGGATTGTAG                   |
| <i>CmCER9-2</i>  | TTGGTTCATTGGGCTGTA                   | TCACGGAAAGGATTGTAG                   |
| <i>CmCER10-1</i> | GTCATCCACCCAGTTCAG                   | AGTAAGCAATGTAAGAGCC                  |
| <i>CmCER10-2</i> | TCGGAGCAGTGAGAAAT                    | CAGGTTGGACGGGTAGAG                   |
| <i>CmCER11-1</i> | ATGAGTCGTTTAGGGTTT                   | GAGAATAGCGAGTGGAGTA                  |
| <i>CmCER11-2</i> | ACTCTGGACGAGGTGTTT                   | GCTTCCCTTCTTGTTCTA                   |
| <i>CmCER13</i>   | GGGGCTTCAAGAGGATTA                   | GGATGATGGCTGGTGATT                   |
| <i>CmCER17</i>   | CCCACAGGAGTTTCAAGG                   | AAGCGGTATCAAAGAGCC                   |
| <i>CmCER60-1</i> | CCTTGTCTTTCTATCAACCCTT               | CCTGCCTTGTGCATTTCC                   |
| <i>CmCER60-2</i> | TTCTGTCCGCAATAGTCAA                  | GTAAGGGATGGTGTAGGG                   |
| <i>CmCER60-3</i> | TGGGAGGTGATGAGGAAT                   | GTTTGAAGGTGGCTGGGT                   |
| <i>CmCER60-4</i> | GGAAGGACTGCATTGAAGGGTA               | TGGGCGTTTGAAGGTGGC                   |
| <i>CmCER60-5</i> | ATAAGTTCCGAATGAGAAG                  | CTGACAATTAGAGCCAAA                   |
| <i>CmCER60-6</i> | CTTGTTGTCACTACCGAGTC                 | AAAGCATTGCATACCCAC                   |
| <i>CmCER60-7</i> | GCAGTGCGGGACTTATTT                   | TTGCTCGATTGACAACA                    |
| <i>CmCER60-8</i> | GTATGAATTGGCTTACTCTG                 | GCTGACACTTTAGGCACA                   |
